# Supplementary material for: Facile synthesis of hierarchical N-doped hollow porous carbon whiskers with ultrahigh surface area via synergistic inner–outer activation for casein hydrolysate adsorption
Source: Royal Society of Chemistry journal article supplement (doi:10.1039/c7tb02345f), 2017-01-01
Supplement: c7tb02345f1.pdf [file c7tb02345f1.pdf]

## Supporting Information

### Facile synthesis of hierarchical N-doped hollow porous carbon whisker with ultrahigh surface area via synergistic inner-outer activation for casein hydrolysate adsorption

Xin He,<sup>a,b</sup> Pengru Liu,<sup>a</sup> Jing Liu,<sup>a,b</sup> Muhammad Yaseen,<sup>a,c</sup> Mei-ping Zhu,<sup>a</sup> Jianhua Sun,<sup>a,b</sup> Xuemin Cui,<sup>a,b</sup> Dankui Liao<sup>\*,a,b</sup> and Zhangfa Tong<sup>\*,a,b</sup>

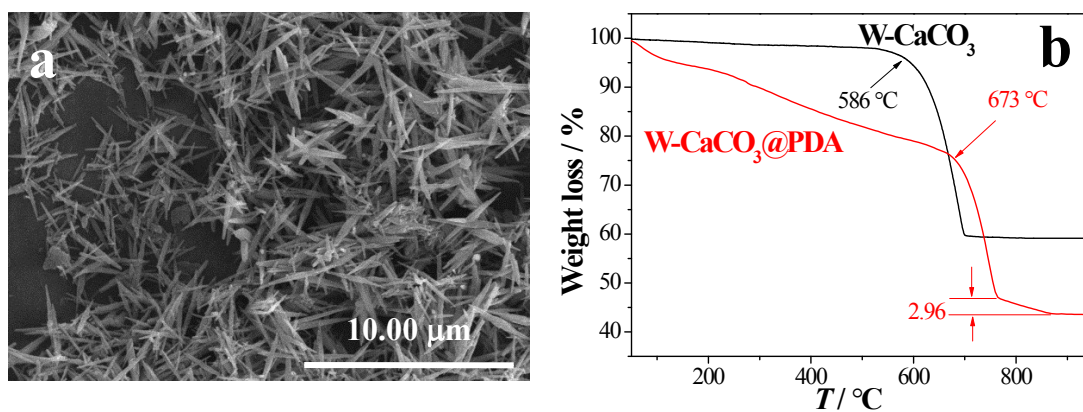

Figure S1. SEM images of (a) W-CaCO<sub>3</sub> whisker particles; (b) TGA curves of the W-CaCO<sub>3</sub> and W-CaCO<sub>3</sub>@PDA.

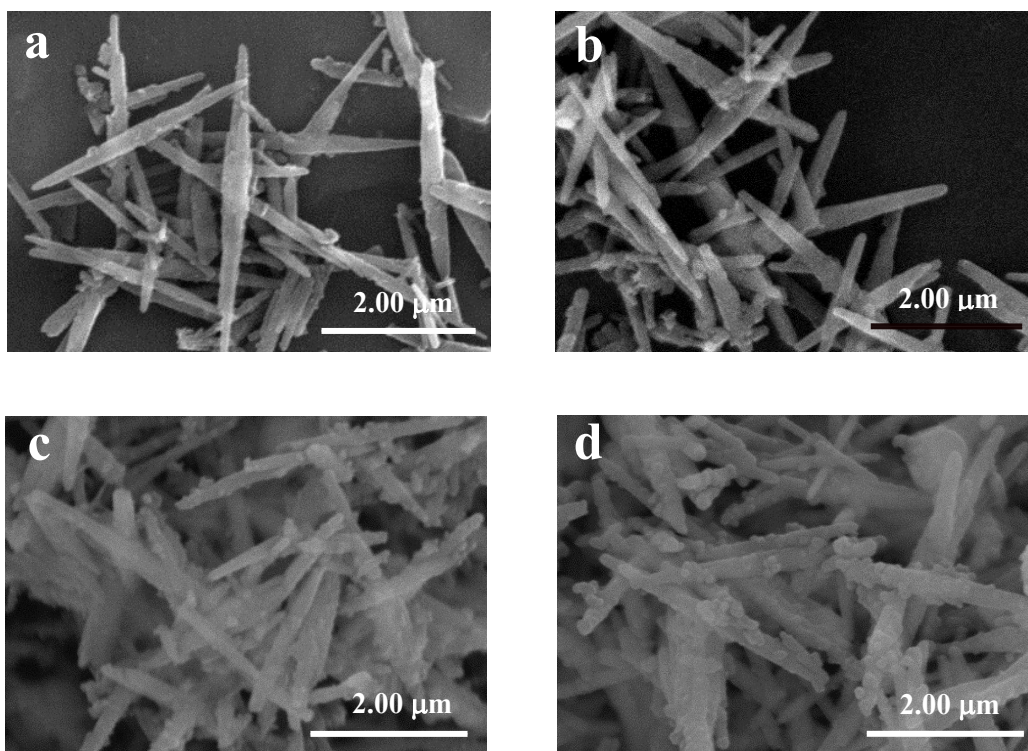

Figure S2. SEM images of W-CaCO<sub>3</sub>@PDA obtained with different concentrations of dopamine hydrochloride solution: (a) 2 g·L<sup>-1</sup>, (b) 4 g·L<sup>-1</sup>, (c) 5 g·L<sup>-1</sup>, (d) 7 g·L<sup>-1</sup>.

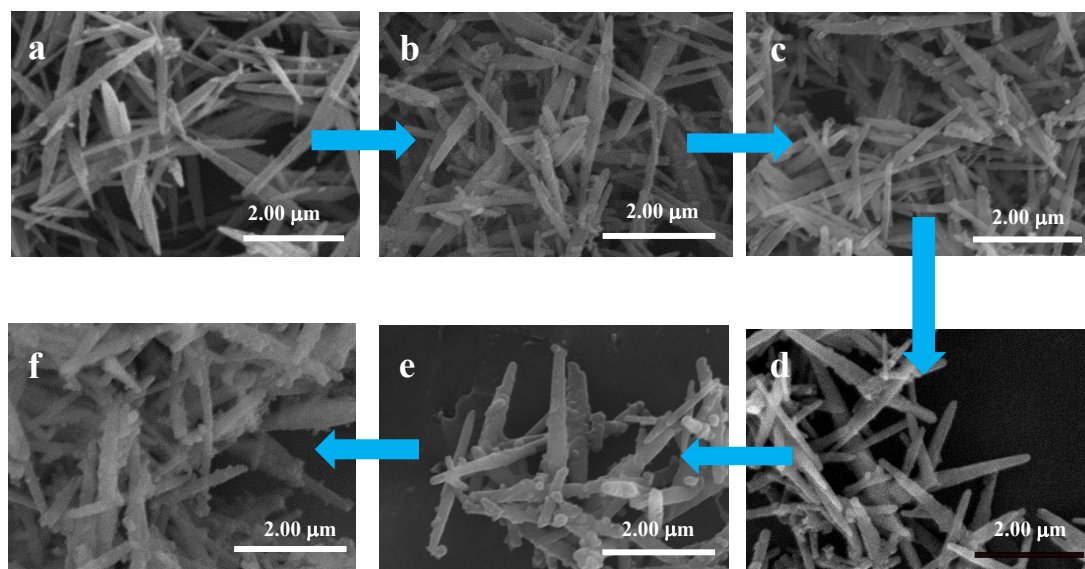

Figure S3. SEM images of W-CaCO<sub>3</sub> particles and W-CaCO<sub>3</sub>@PDA synthesized at different reaction times under 4 g·L<sup>-1</sup> of dopamine hydrochloride solution: (a) 0 h; (b) 2 h; (c) 10 h; (d) 20 h; (e) 25 h; (f) 30 h.

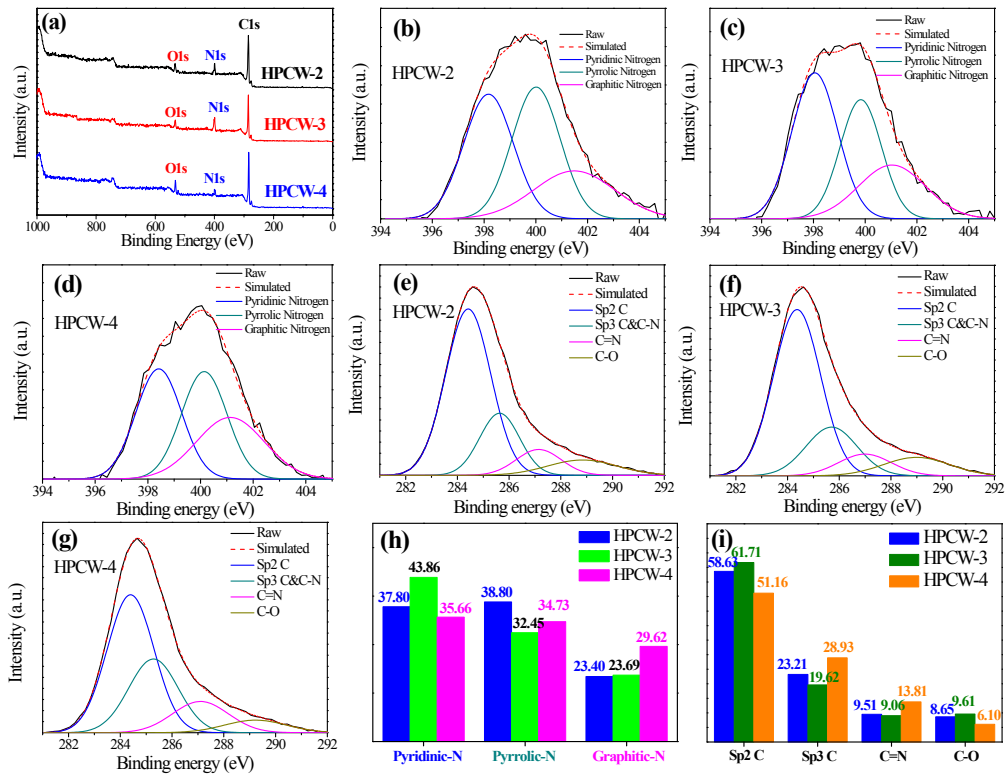

Figure S4. (a-g) XPS spectra, (h) N species (N 1s XPS) and (i) C species (C 1s XPS) contents of HPCW-2, HPCW-3 and HPCW-4.

Table S1. Pore structure parameters of HPCWs materials.

| Sample     | Langmuir<br>( $\text{m}^2 \cdot \text{g}^{-1}$ ) | BET<br>( $\text{m}^2 \cdot \text{g}^{-1}$ ) | $V_t$<br>( $\text{cm}^3 \cdot \text{g}^{-1}$ ) | $V_m$<br>( $\text{cm}^3 \cdot \text{g}^{-1}$ ) | $S_m$<br>( $\text{m}^2 \cdot \text{g}^{-1}$ ) | $S_m/S_t$<br>(%) |
|------------|--------------------------------------------------|---------------------------------------------|------------------------------------------------|------------------------------------------------|-----------------------------------------------|------------------|
| HPCW-1     | 780.2                                            | 638.4                                       | 1.104                                          | 0.173                                          | 382.6                                         | 59.93            |
| HPCW-2     | 3648.8                                           | 3007.0                                      | 1.669                                          | 0.886                                          | 2255.9                                        | 75.02            |
| HPCW-3     | 3354.3                                           | 2802.0                                      | 2.631                                          | 0.700                                          | 1754.3                                        | 62.61            |
| HPCW-4     | 2843.4                                           | 2372.8                                      | 1.125                                          | 0.796                                          | 2044.7                                        | 86.17            |
| HPCW-5     | 843.9                                            | 707.4                                       | 0.641                                          | 0.246                                          | 589.5                                         | 83.33            |
| HPCW-1-800 | 623.6                                            | 531.0                                       | 0.908                                          | 0.136                                          | 313.5                                         | 59.04            |
| HPCW-1-900 | 413.2                                            | 290.6                                       | 0.880                                          | 0.044                                          | 84.2                                          | 28.97            |

Table S2. Comparison of Adsorption quantity of some porous materials for proteins and peptides.

| Sample                                                | AC <sup>1</sup> | P(GMA–DVB) <sup>2</sup> | OMC <sup>3</sup> |
|-------------------------------------------------------|-----------------|-------------------------|------------------|
| <b>Adsorption quantity (mg·g<sup>-1</sup>)</b>        | <b>329</b>      | <b>51.6</b>             | <b>300</b>       |
| Surface areas (BET, m <sup>2</sup> ·g <sup>-1</sup> ) | 1408            | 312                     | 639              |
| Adsorbate                                             | Ile-Trp         | BSA                     | BSA              |

## REFERENCES

- [1] F. Hippauf, C. Huettner, D. Lunow, L. Borchardt, T. Henle and S. Kaskel, *Carbon*, **2016**, 107, 116-123.
- [2] R. W. Wang, Y. Zhang, G. H. Ma and Z. G. Su, *Colloids and Surfaces B: Biointerfaces*. **2006**, 51, 93–99.
- [3] H. Q. Qin, P. Gao, F. J. Wang, L. Zhao, J. Zhu, A. Q. Wang, T. Zhang, R. A. Wu and H. F. Zou, *Angew. Chem. Int. Ed.*, **2011**, 50, 12218-12221.
